# Supplementary material for: Study of insecticide translocation in coconut palm trees after using pressurized endotherapy
Source: Royal Society of Chemistry journal article supplement (doi:10.1039/d2ay01328b), 2022-01-01
Supplement: d2ay01328b1.pdf [file d2ay01328b1.pdf]

Supplementary Material for

**Study of insecticide translocation in coconut palm trees after  
using pressurized endotherapy**

Jordana Alves Ferreira<sup>1\*</sup>, Gabriela Brito Almeida<sup>1</sup>, Paulo M. Pontes Lins<sup>2</sup>, Marley M. Tavares<sup>1</sup>,  
Samuel C. C. Farias<sup>2</sup> and Sonia C. N. Queiroz<sup>1</sup>

Correspondence to:

[jordanaalvesferreira@gmail.com](mailto:jordanaalvesferreira@gmail.com); [sonia.queiroz@embrapa.br](mailto:sonia.queiroz@embrapa.br)

**This PDF file includes:**  
Figs. S1 to S2

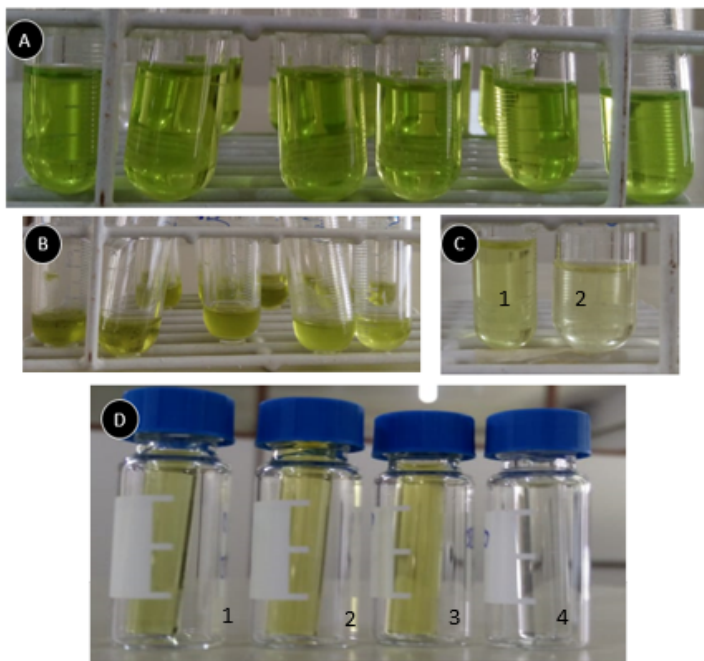

**Fig. S1** – The Figure shows the visual profile of the extracts after sample drying procedure and solvent reconstitution. (A) Extracts after the cleaning step; (B) Samples after drying and reconstitution in ethyl acetate; (C) Extracts after cleaning: 1 – 10 mg of GCB and 2 – 50 mg of GCB; (D) Samples without vial: 1 – without GCB; 2 - 10 mg of GCB; 3 – 20 mg of GCB and 4 – 50 mg of CGB.

# QuEChERS – Coconut leaves/frond

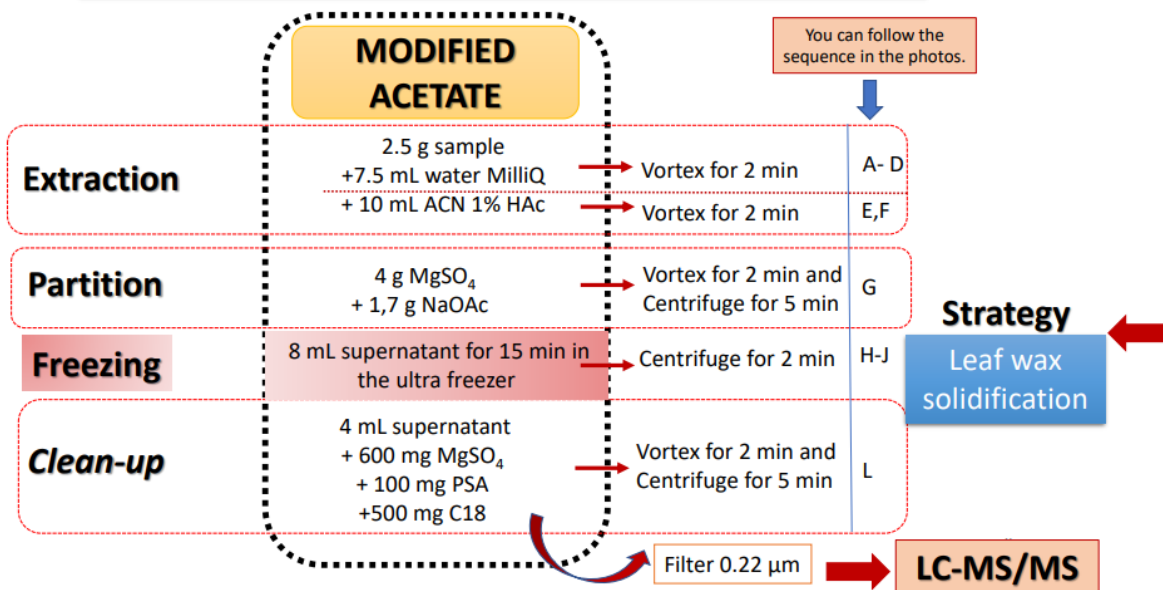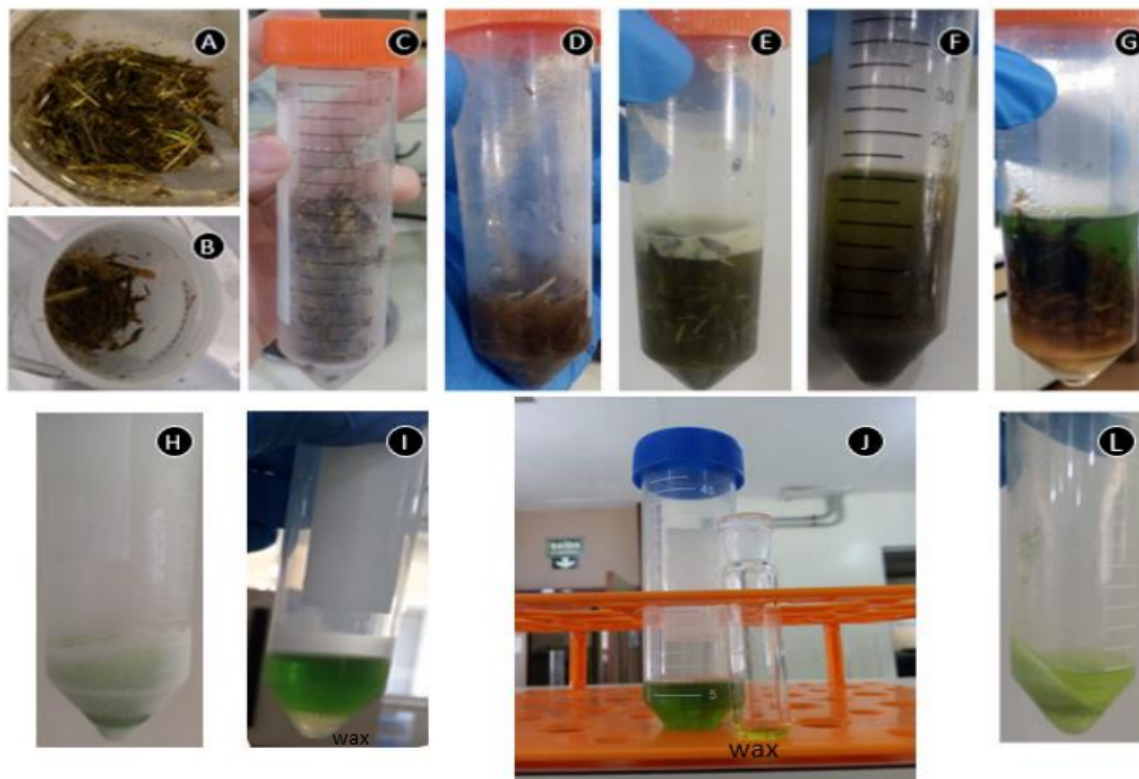

**Fig. S2** – Detailed procedure of coconut leaf extraction method using modified QuEChERS. **Extraction:** (A-C) Leaf sample inside the falcon tube; (D) Sample with the addition of deionized water; (E) Addition of solvent; **Partition:** (F) Addition of salts; (G) Sample after centrifugation; (H) Supernatant freezing; (I) Centrifuge for 2 min; (J) Separation of the wax from the sample; **Clean-up:** Final appearance of the sample after the addition of clean-up salts and centrifugation.
